# Supplementary material for: State-dependent Lipid Interactions with the A2a Receptor Revealed by MD Simulations Using In Vivo-Mimetic Membranes
Source: PubMed Central journal article supplement (PMC7031699; doi:10.1016/j.str.2018.10.024), 2019-02-05
Supplement: mmc1.pdf [file mmc1.pdf]

**Structure, Volume 27**

**Supplemental Information**

**State-dependent Lipid Interactions with the A2a  
Receptor Revealed by MD Simulations  
Using *In Vivo*-Mimetic Membranes**

**Wanling Song, Hsin-Yung Yen, Carol V. Robinson, and Mark S.P. Sansom**

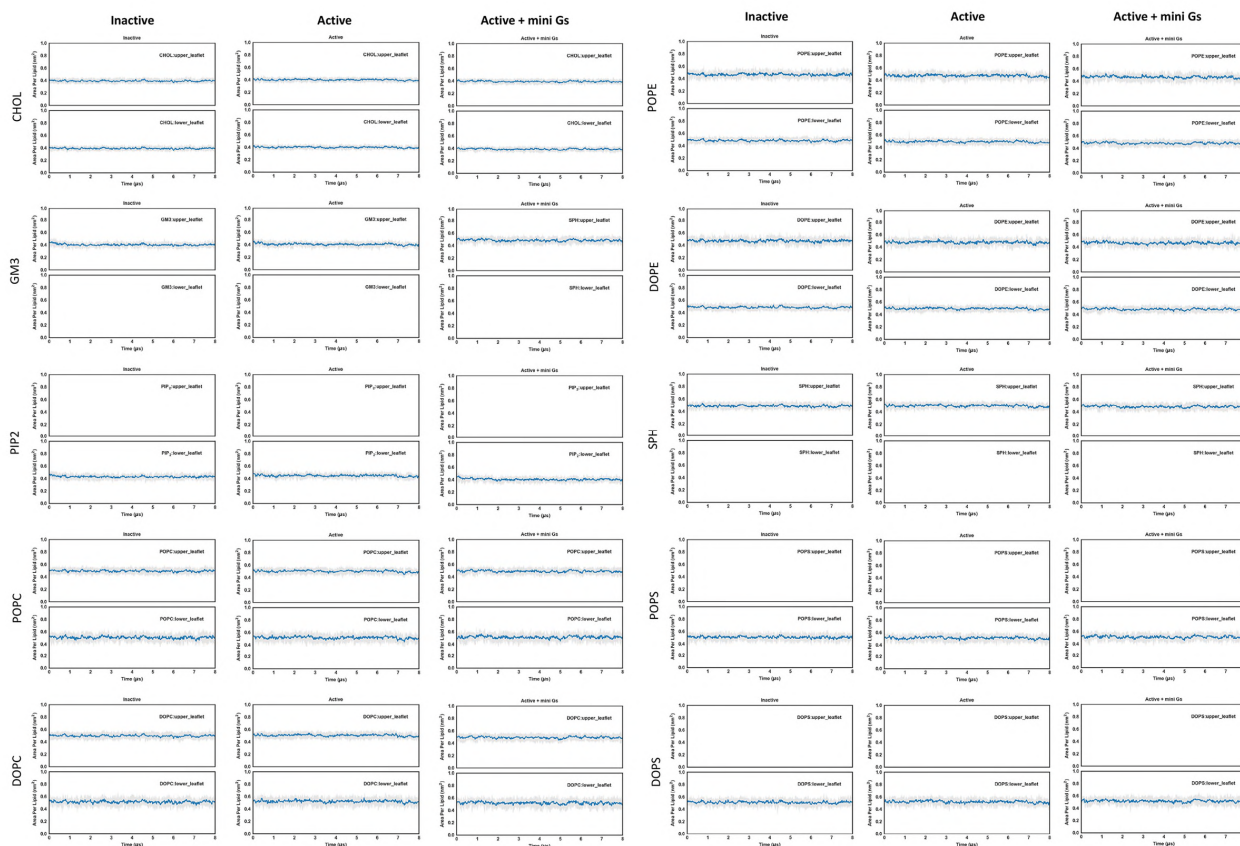

*SI Figure S1 Area per lipid (APL) as a function of simulation time. Related to STAR Methods.*

APL for each lipid species was calculated from the two leaflets separately. See Methods for more details on the calculation. The blue lines are the average and the surrounding grey shades represent the range between the maximum and minimum from the 10 simulations of each conformational state.

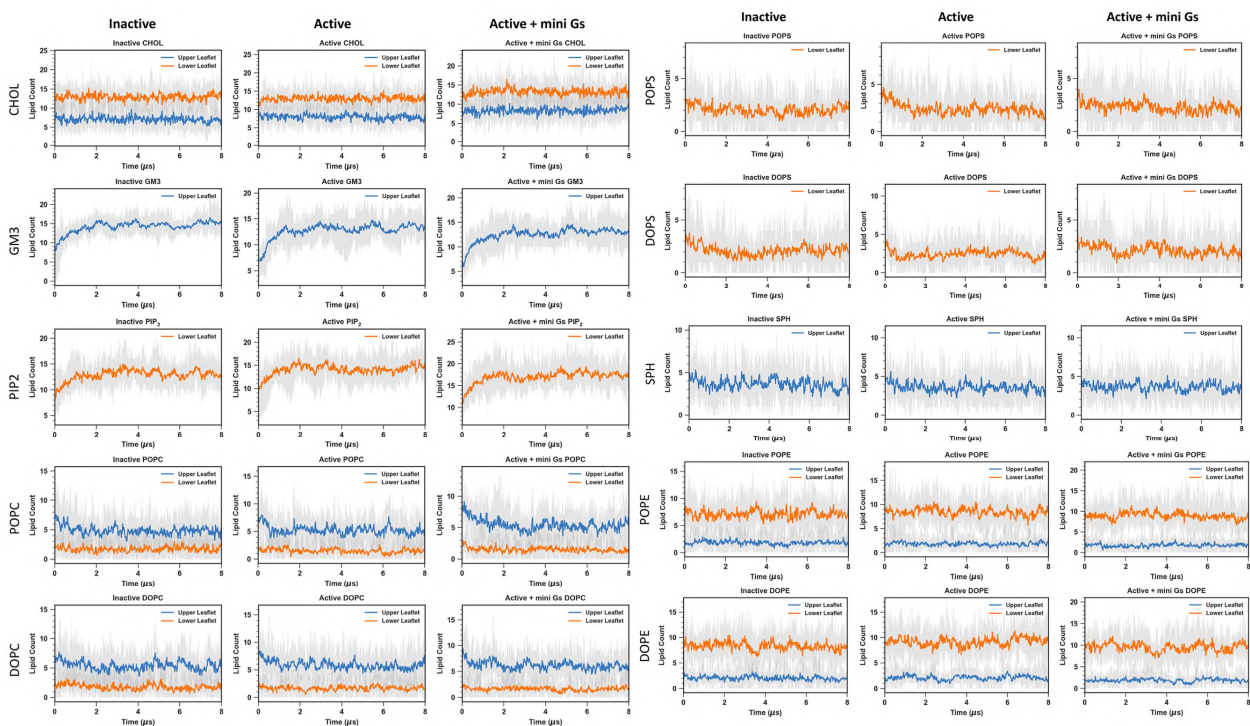

*SI Figure S2 Lipid count in the first lipid shell surrounding the receptor as a function of time. Related to STAR Methods.*

The first lipid shell is defined as within 1 nm of the receptor surface as indicated by radial distribution functions (Figure 2A). The orange line and the surrounding grey shades are the average values and the range between maximum and minimum of the lipid counts from the lower leaflet in the 10 simulations of each conformational state. The blue line and the surrounding grey shades are the average and the range of lipid counts from the upper leaflet.

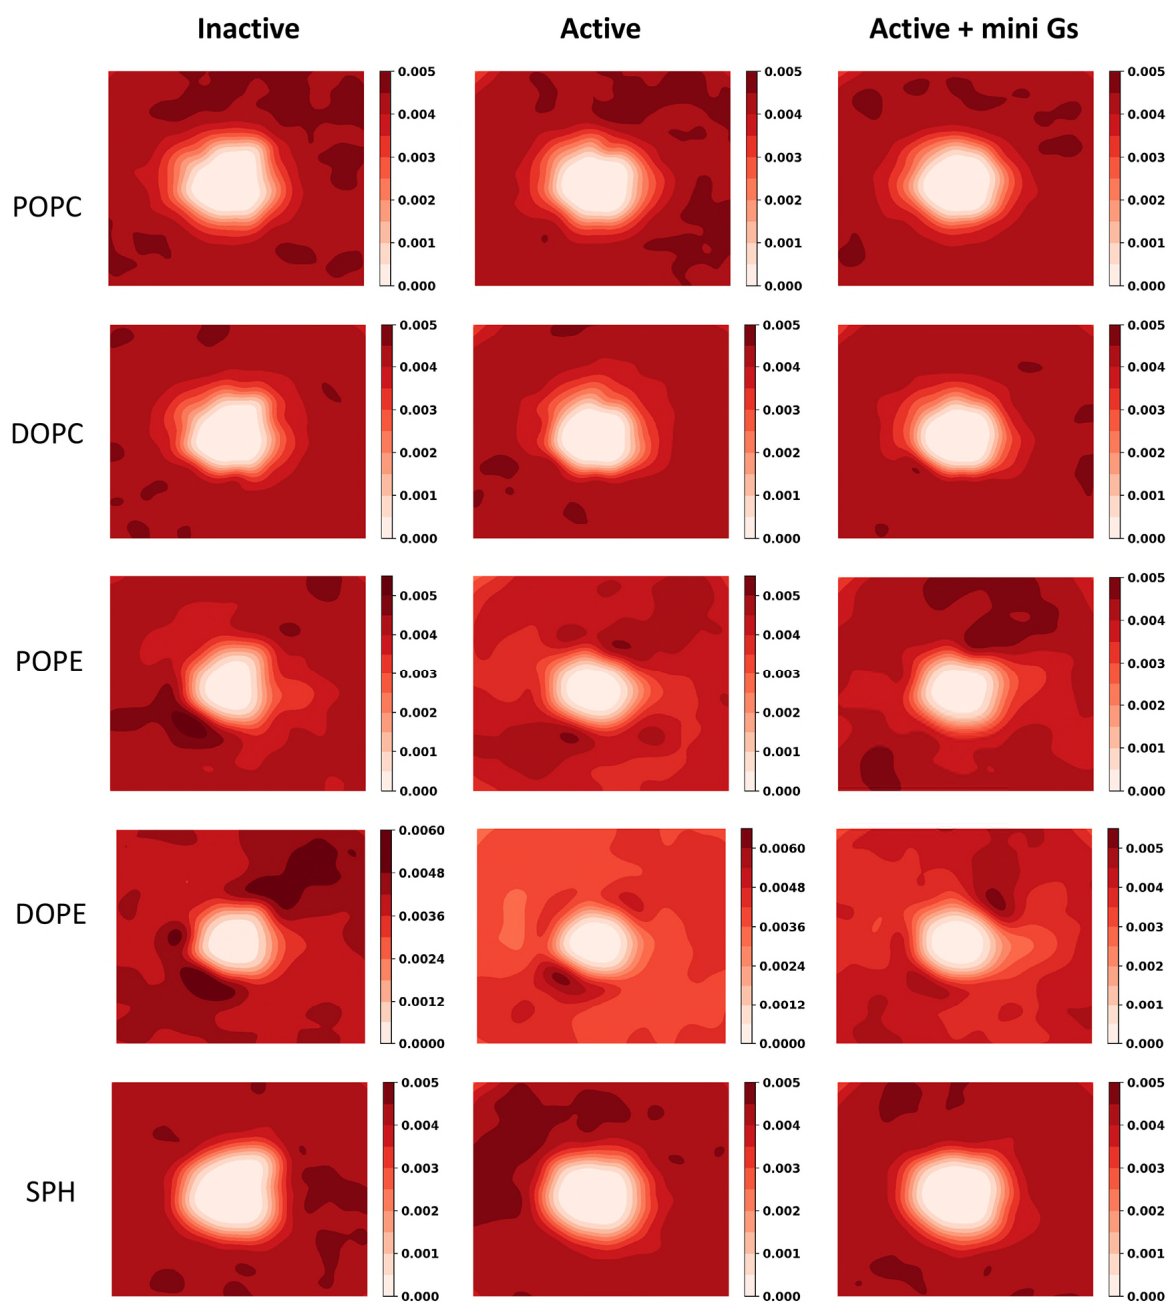

*SI Figure S3 Density of bulk lipids in the upper leaflet surrounding the receptor in different conformational states. Related to Figure 2.*

The density was averaged over the 10 simulations of each conformational state.

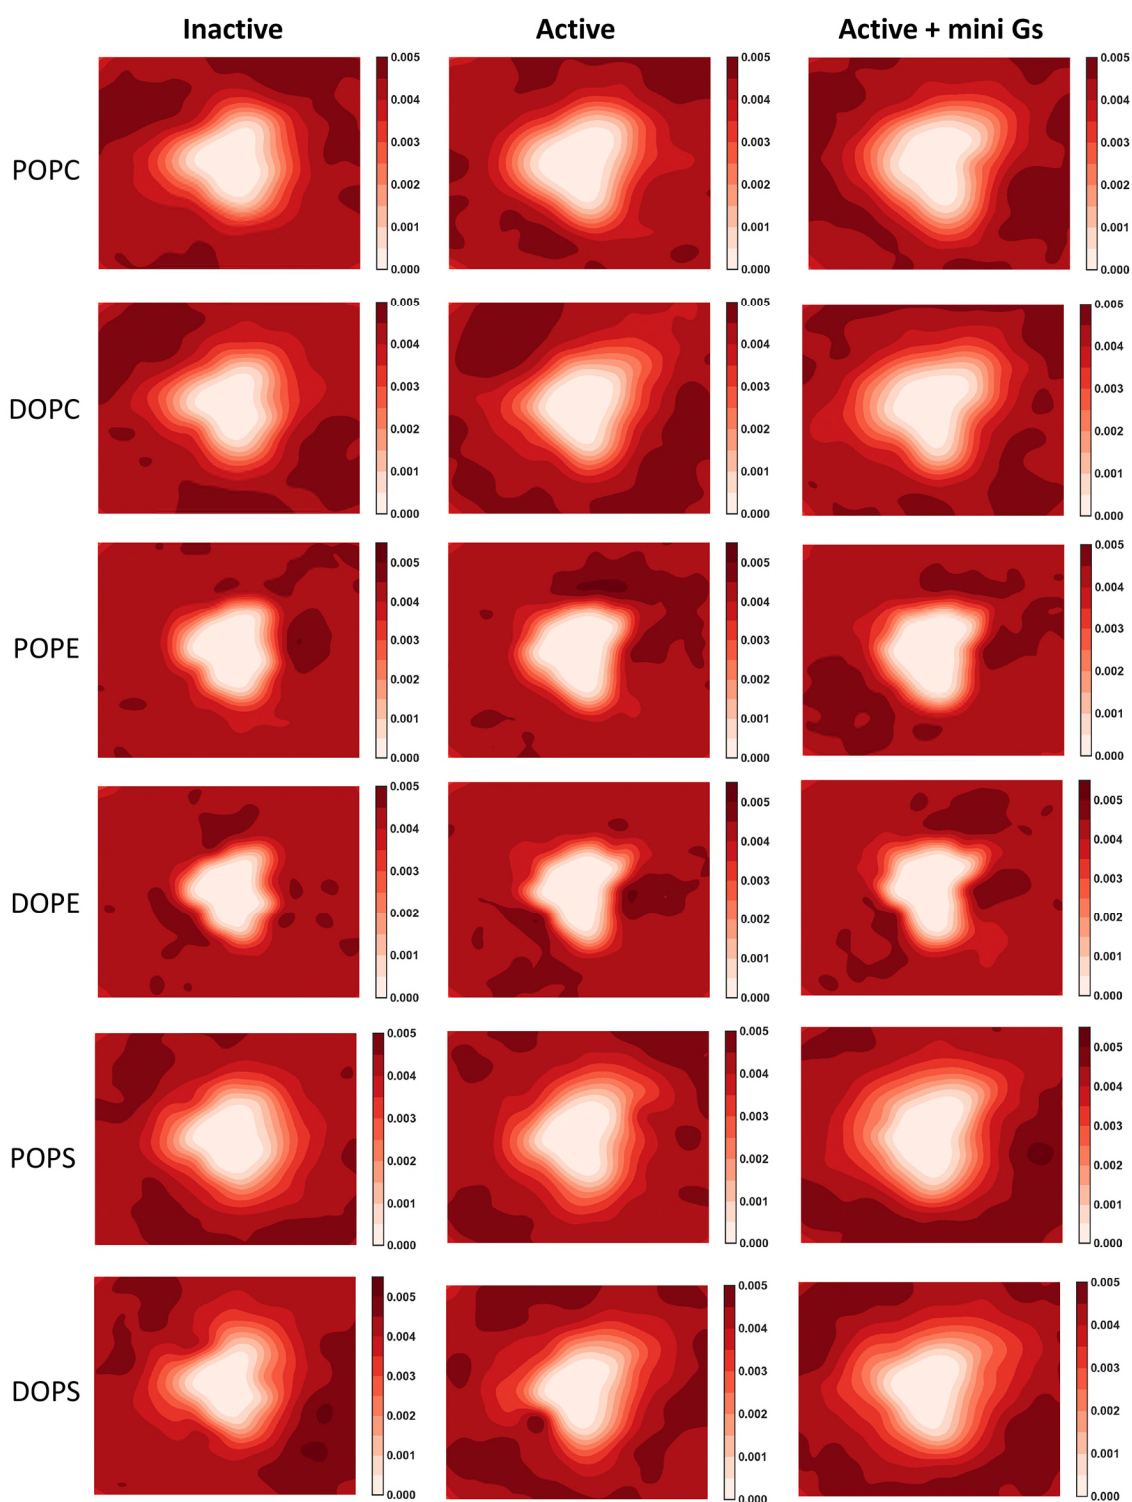

*SI Figure S4 Density of bulk lipids in the lower leaflet surrounding the receptor in different conformational states. Relate to Figure 2.*

The density was averaged over the 10 simulations of each conformational state.



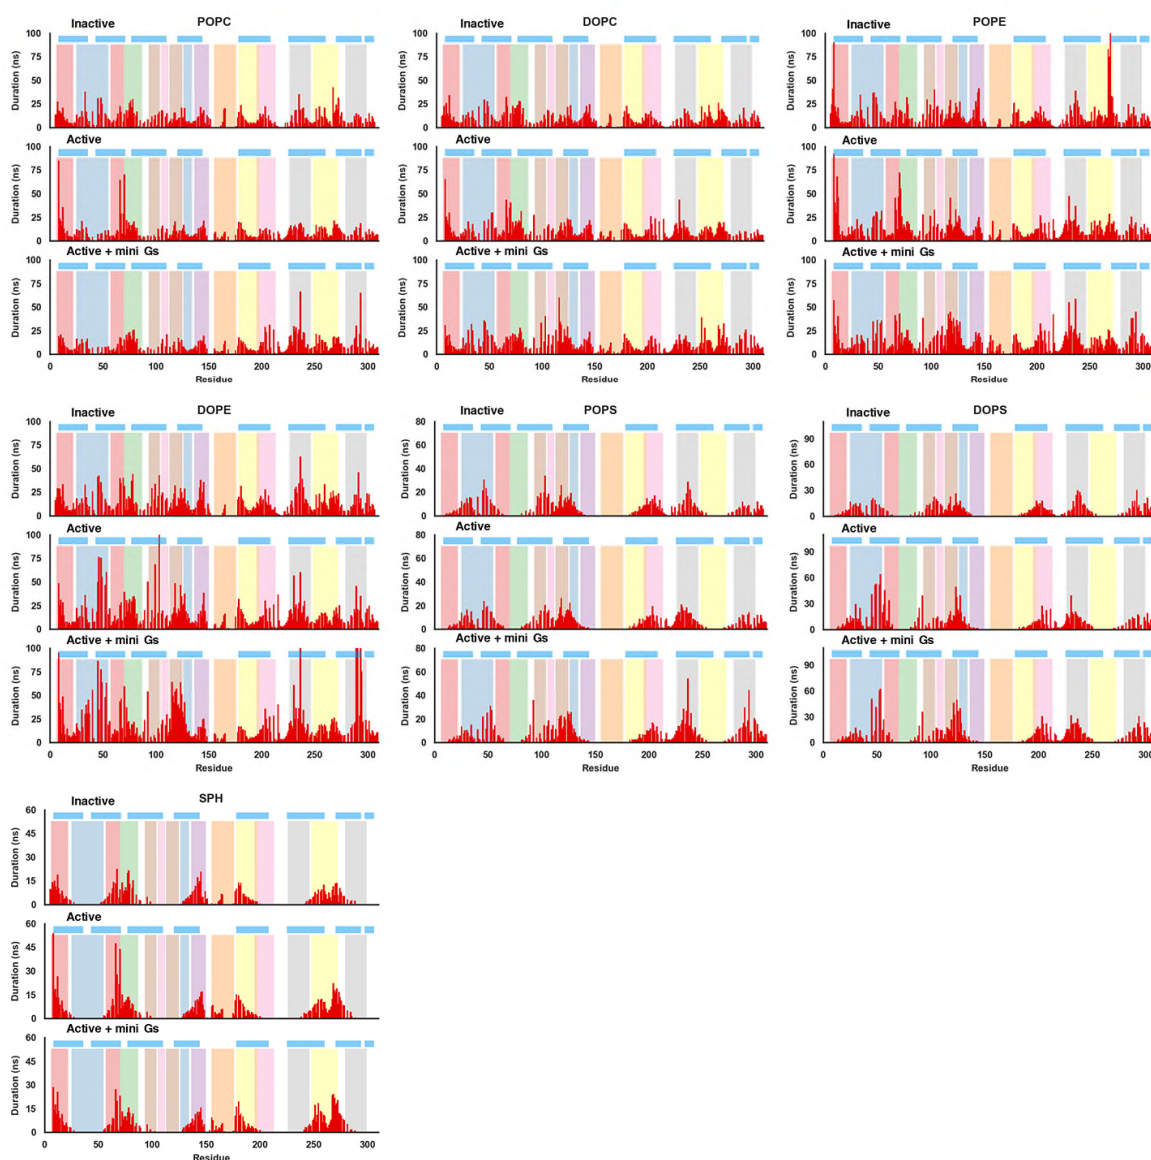

*SI Figure S5 Interaction duration as a function of the receptor residue index for the bulk lipids that do not show specific interactions with the receptor. Relate to Figure 3.*

The horizontal blue lines indicate the positions of the transmembrane helices, and the vertical coloured bands indicate the 9 lipid binding sites identified from this analysis.

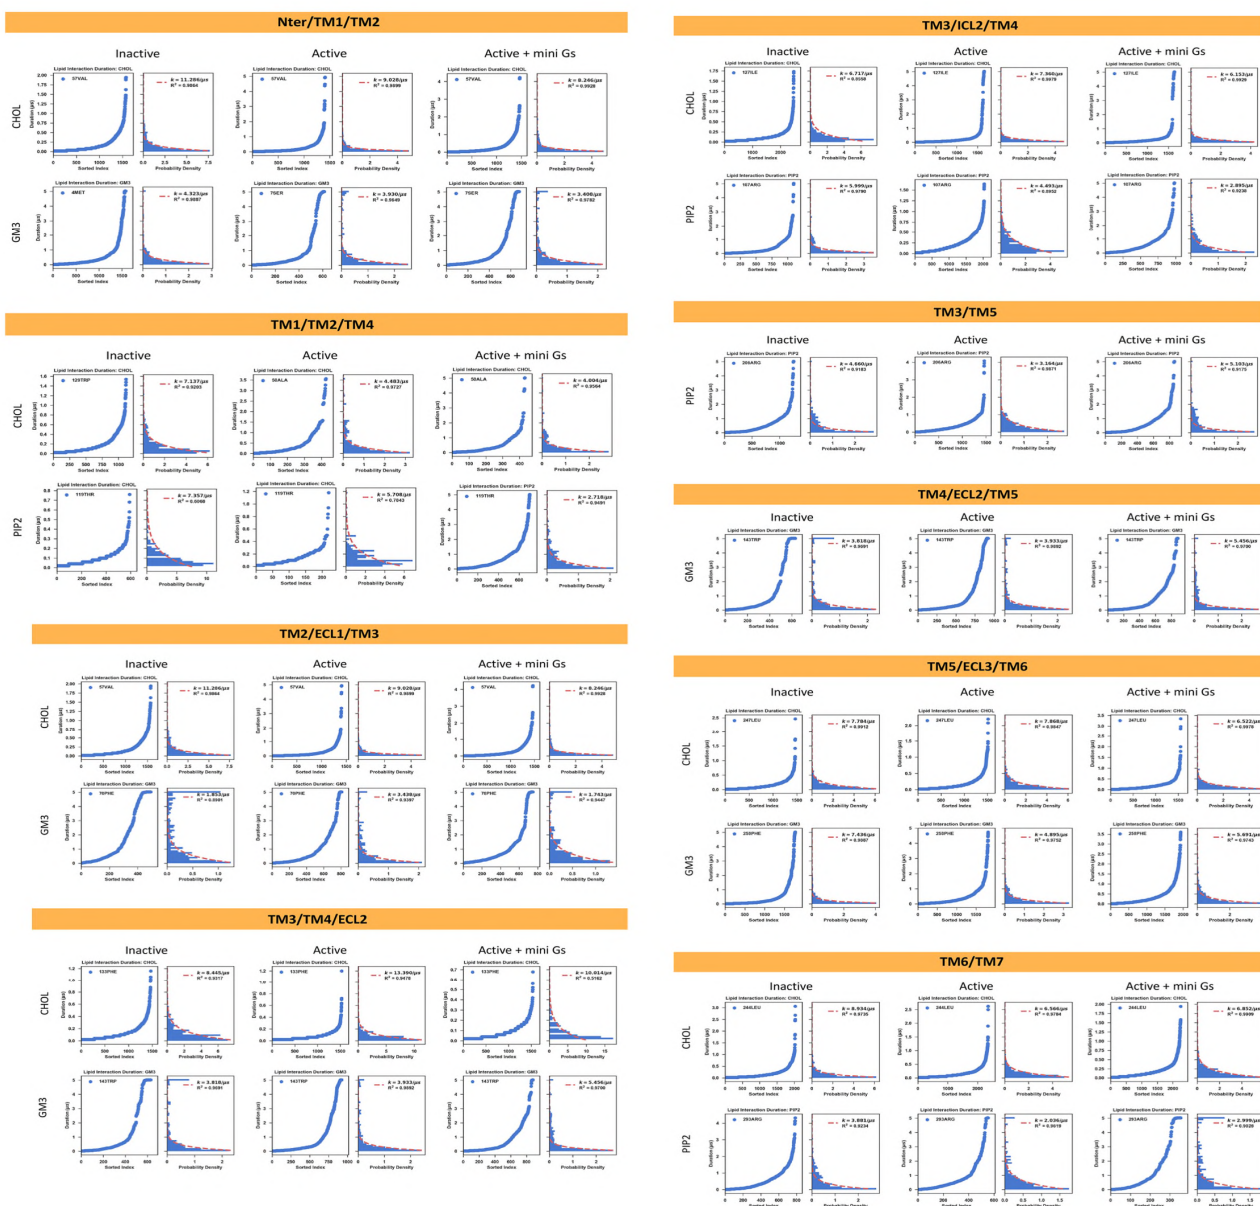

*SI Figure S6  $k_{off}$  determination based on the decay of interaction durations as a function of time. Relate to Figure 3, Figure 4, SI Table S8 and STAR Methods.*

For each pair of panels, the left is the sorted interaction durations of the lipid species of study to the residue in the binding site that showed the strongest interaction with the species; and the right is the density distribution of the interaction durations. Mono-exponential curve  $y = Ae^{kx}$  was fitted to the probability density (red dotted line), from which  $k_{off}$  was estimated.

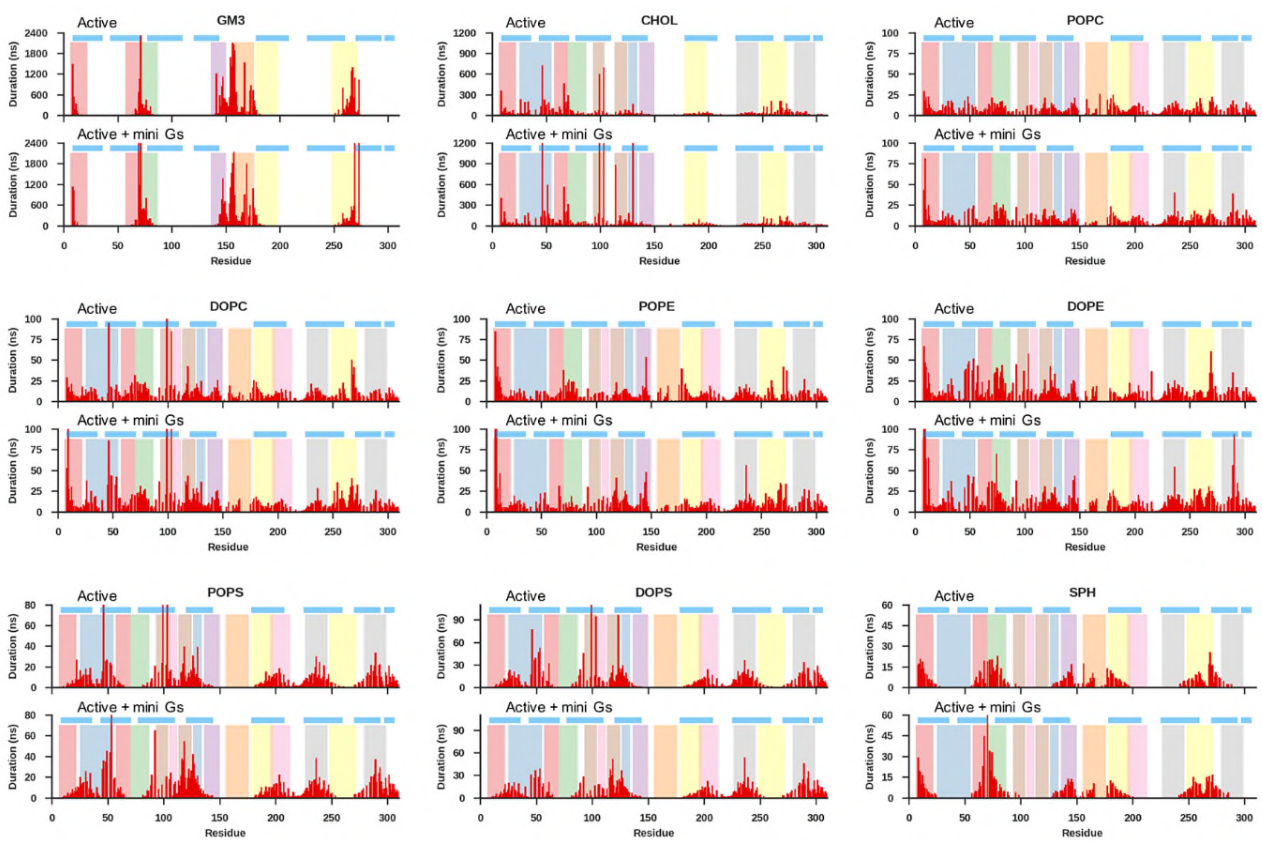

*SI Figure S7 Interaction duration as a function of the receptor residue index in the PIP<sub>2</sub>-deprived simulations. Relate to Figure 3.*

The horizontal blue lines indicate the positions of the transmembrane helices, and the vertical coloured bands indicate the 9 lipid binding sites identified from this analysis.



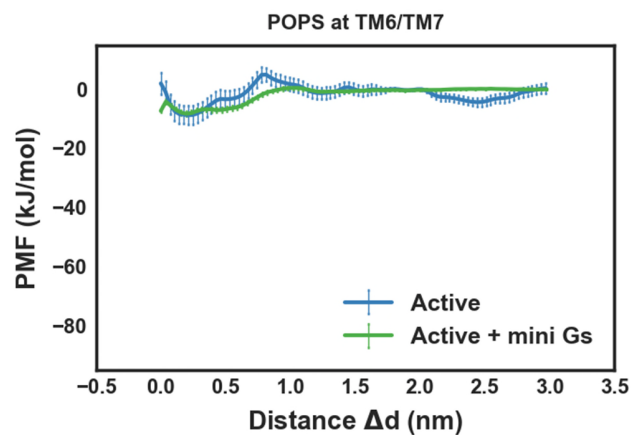

*SI Figure S8 Potential of Mean Forces (PMFs) of POPS binding to the site TM6/TM7 in the PIP<sub>2</sub>-deprived membrane bilayer. Relate to Figure 5.*

The PMFs were calculated for A2a in active state and active + mini Gs state respectively. Error bars represent the statistical error calculated by Bayesian bootstrap.

*Table S1 Lipid composition of the PIP<sub>2</sub>-containing in vivo-mimetic membrane. Related to Figure 1.*

| Lipid Species    | Content (%)   |               |
|------------------|---------------|---------------|
|                  | Upper leaflet | Lower leaflet |
| POPC             | 20            | 5             |
| DOPC             | 20            | 5             |
| POPE             | 5             | 20            |
| DOPE             | 5             | 20            |
| SPH              | 15            | 0             |
| GM <sub>3</sub>  | 10            | 0             |
| CHOL             | 25            | 25            |
| POPS             | 0             | 8             |
| DOPS             | 0             | 7             |
| PIP <sub>2</sub> | 0             | 10            |

Abbreviations:

POPC = 1-palmitoyl-2-oleoyl-sn-glycero-3- phosphocholine; DOPC = 1-palmitoyl-2-oleoyl-sn-glycero-3- phosphocholine; POPE = 1-palmitoyl-2-oleoyl-sn-glycero-3- phosphoethanolamine; DOPE = Dioleoyl-sn-glycero-3- phosphoethanolamine; POPS = Dioleoyl-sn-glycero-3- phosphoethanolamine; DOPS = Dioleoyl-sn-glycero-3- phosphoserine; PIP<sub>2</sub> = Phosphatidylinositol-4,5-bisphosphate, GM3 = N-stearoyl -D-erythro monosialodihexosylganglioside; SPH = Sphingomyelin; CHOL = Cholesterol

*Table S2 Lipid composition of the PIP<sub>2</sub>-deprived membrane. Related to Figure 7 and SI Figure S7*

| Lipid Species    | Content (%)   |               |
|------------------|---------------|---------------|
|                  | Upper leaflet | Lower leaflet |
| POPC             | 20            | 7.5           |
| DOPC             | 20            | 7.5           |
| POPE             | 5             | 22.5          |
| DOPE             | 5             | 22.5          |
| SPH              | 15            | 0             |
| GM <sub>3</sub>  | 10            | 0             |
| CHOL             | 25            | 25            |
| POPS             | 0             | 8             |
| DOPS             | 0             | 7             |
| PIP <sub>2</sub> | 0             | 0             |

*Table S3: Overview of non-biased MD simulations. Related to Figure 1.*

| Simulation                            | Protein Structure   | Bilayer#            | Repeats x Duration | Data analysed ( $\mu$ s) |
|---------------------------------------|---------------------|---------------------|--------------------|--------------------------|
| Inactive                              | 3EML                | +PIP <sub>2</sub>   | 10 x 8 $\mu$ s     | 5                        |
| Active                                | 5G53 (A2a)          | +PIP <sub>2</sub>   | 10 x 8 $\mu$ s     | 5                        |
| Active, no PIP <sub>2</sub>           | 5G53 (A2a)          | no PIP <sub>2</sub> | 2 x 8 $\mu$ s      | 5                        |
| Active + mini Gs                      | 5G53 (A2a + mini G) | +PIP <sub>2</sub>   | 10 x 8 $\mu$ s     | 5                        |
| Active + mini Gs, no PIP <sub>2</sub> | 5G53 (A2a + mini G) | no PIP <sub>2</sub> | 2 x 8 $\mu$ s      | 5                        |
| Control Membranes                     | -                   | +PIP <sub>2</sub>   | 10 x 8 $\mu$ s     | 5                        |

# The bilayer lipid compositions are listed in SI Tables S1 and S2.



*Table S4 Overview of PMF calculations. Related to Figure 5 and 7*

| Freeze part                                                                                               | Pull part                           | Membrane                     | No. of windows | Length of each window ( $\mu$ s) | No. of PMF calculation for each state |
|-----------------------------------------------------------------------------------------------------------|-------------------------------------|------------------------------|----------------|----------------------------------|---------------------------------------|
| <b><i>A2a-mini Gs interactions in the presence of PIP<sub>2</sub></i></b>                                 |                                     |                              |                |                                  |                                       |
| A2a active                                                                                                | mini Gs                             | PIP <sub>2</sub> -containing | 50             | 1                                | 3                                     |
| <b><i>A2a-mini Gs interactions in the absence of PIP<sub>2</sub></i></b>                                  |                                     |                              |                |                                  |                                       |
| A2a active                                                                                                | mini Gs                             | Non-PIP <sub>2</sub>         | 50             | 1                                | 3                                     |
| <b><i>A2a-PIP<sub>2</sub> interactions in inactive state, active state and active + mini Gs state</i></b> |                                     |                              |                |                                  |                                       |
|                                                                                                           | PIP <sub>2</sub> at<br>TM1/TM2/TM4  |                              |                |                                  | 1, 1, 1                               |
| A2a inactive,<br>A2a active,<br>A2a active + mini<br>Gs                                                   | PIP <sub>2</sub> at<br>TM3/ICL2/TM4 |                              |                |                                  | 1, 1, 1                               |
|                                                                                                           | PIP <sub>2</sub> at TM3/TM5         | PIP <sub>2</sub> -containing | 50             | 1.5                              | 1, 1, 1                               |
|                                                                                                           | PIP <sub>2</sub> at TM6/TM7         |                              |                |                                  | 1, 1, 1                               |
| <b><i>A2a-POPS interaction in active state</i></b>                                                        |                                     |                              |                |                                  |                                       |
| A2a active                                                                                                | PIP <sub>2</sub> at TM6/TM7         | Non-PIP <sub>2</sub>         | 50             | 1.5                              | 1                                     |
| <b><i>A2a-POPS interaction in active state + mini Gs state</i></b>                                        |                                     |                              |                |                                  |                                       |
| A2a active + mini Gs                                                                                      | PIP <sub>2</sub> at TM6/TM7         | Non-PIP <sub>2</sub>         | 50             | 1.5                              | 1                                     |

*Table S5 Average area per lipid (APL) for each lipid species and the average APL from all lipid species from each leaflet. The values were averaged from the 10 equilibrium simulations of each conformational state. Related to SI Figure S1 and STAR Methods.*

| Lipid Species  |               | Conf. States                  |                             |                                       |
|----------------|---------------|-------------------------------|-----------------------------|---------------------------------------|
|                |               | Inactive (nm <sup>2</sup> ) * | Active (nm <sup>2</sup> ) * | Active + mini Gs (nm <sup>2</sup> ) * |
| <b>Average</b> | Upper leaflet | 0.458 ± 0.000                 | 0.466 ± 0.000               | 0.454 ± 0.000                         |
|                | Lower leaflet | 0.477 ± 0.000                 | 0.486 ± 0.000               | 0.475 ± 0.000                         |
| CHOL           | Upper leaflet | 0.393 ± 0.001                 | 0.400 ± 0.001               | 0.392 ± 0.001                         |
|                | Lower leaflet | 0.390 ± 0.001                 | 0.397 ± 0.001               | 0.388 ± 0.001                         |
| GM3            | Upper leaflet | 0.402 ± 0.001                 | 0.406 ± 0.002               | 0.387 ± 0.001                         |
|                | Lower leaflet | N/A                           | N/A                         | N/A                                   |
| PIP2           | Upper leaflet | N/A                           | N/A                         | N/A                                   |
|                | Lower leaflet | 0.427 ± 0.001                 | 0.445 ± 0.002               | 0.404 ± 0.001                         |
| POPC           | Upper leaflet | 0.494 ± 0.001                 | 0.501 ± 0.001               | 0.490 ± 0.001                         |
|                | Lower leaflet | 0.506 ± 0.001                 | 0.515 ± 0.001               | 0.511 ± 0.001                         |
| DOPC           | Upper leaflet | 0.496 ± 0.001                 | 0.505 ± 0.001               | 0.492 ± 0.001                         |
|                | Lower leaflet | 0.512 ± 0.001                 | 0.521 ± 0.001               | 0.526 ± 0.001                         |
| POPE           | Upper leaflet | 0.466 ± 0.001                 | 0.474 ± 0.001               | 0.465 ± 0.001                         |
|                | Lower leaflet | 0.481 ± 0.001                 | 0.489 ± 0.001               | 0.481 ± 0.001                         |
| DOPE           | Upper leaflet | 0.470 ± 0.001                 | 0.477 ± 0.001               | 0.460 ± 0.001                         |

|      |               |                 |               |               |
|------|---------------|-----------------|---------------|---------------|
|      | Lower leaflet | 0.0.483 ± 0.001 | 0.493 ± 0.001 | 0.483 ± 0.001 |
| SPH  | Upper leaflet | 0.487 ± 0.001   | 0.497 ± 0.001 | 0.484 ± 0.001 |
|      | Lower leaflet | N/A             | N/A           | N/A           |
| POPS | Upper leaflet | N/A             | N/A           | N/A           |
|      | Lower leaflet | 0.506 ± 0.001   | 0.512 ± 0.001 | 0.509 ± 0.001 |
| DOPS | Upper leaflet | N/A             | N/A           | N/A           |
|      | Lower leaflet | 0.509 ± 0.001   | 0.518 ± 0.001 | 0.513 ± 0.001 |

\* Average value ± S.E.M

Table S6 Cholesterol binding sites in crystal structures. Related to Figure 3 and Figure 4.

| Binding Sites*             | PDB code                                             |
|----------------------------|------------------------------------------------------|
| TM1/H8                     | 4IB4, 4NC3, 5TVN, 3D4S, 5D5A                         |
| <b><i>TM2/ECL1/TM3</i></b> | 4EIY, 5IU4, 5JTB, 5K2A,5UVI, 4OR2                    |
| <b><i>TM1/TM2/TM4</i></b>  | 2RH1, 2Y00, 3D4S, 3NY8, 3NYA, 3PDS, 5D5A, 5XR8, 5XRA |
| <b><i>TM3/ICL2/TM4</i></b> | 2Y00                                                 |
| TM3/TM5                    | 4NTJ                                                 |
| TM4/ECL2/TM5               | 4XNV                                                 |
| TM5/ECL3/TM6               | 4EIY, 5IU4, 5JTB, 5K2A,5UVI                          |
| <b><i>TM6/TM7</i></b>      | 4EIY, 5IU4, 5JTB, 5K2A,5UVI, 4DKL, 4NTJ, 5LWE        |

\* Those sites that exhibited stable cholesterol binding in the simulations are highlighted in ***bold italics***



*Table S7: Lipid binding sites. Related to Figure 4.*

| Binding site | Bound Lipids            | Residues                | Pearson's Correlation Coefficient* |
|--------------|-------------------------|-------------------------|------------------------------------|
| Nter/TM1/TM2 | GM3, CHOL               | S6-V18,<br>V57-F70      | -0.82 (T11),<br>-0.80 (L64)        |
| TM1/TM2/TM4  | PIP <sub>2</sub> , CHOL | V25-V55,<br>A126-T117   | 0.48 (V46)<br>0.63 (T119)          |
| TM2/ECL1/TM3 | GM3, CHOL               | F70-L87                 | -0.44 (I80)                        |
| TM3/TM4/ECL2 | GM3, CHOL               | G136-L150               | -0.49 (L137)                       |
| TM3/ICL2/TM4 | PIP <sub>2</sub> , CHOL | F93-I104,<br>N113-I125  | 0.49 (I124)<br>0.33 (I104)         |
| TM3/TM5      | PIP <sub>2</sub>        | A105-Y112,<br>G195-S213 | N/A                                |
| TM4/ECL2/TM5 | GM3                     | H155-Y176               | N/A                                |
| TM5/ECL3/TM6 | GM3, CHOL               | V178-L198,<br>P248-L272 | -0.30 (F182)                       |
| TM6/TM7      | PIP <sub>2</sub> , CHOL | Q226-W246,<br>T279-F299 | -0.38 (L241)                       |

\*For definition see STAR Methods; also see Figure 4.

Table S8  $k_{off}$  of Group 1 lipids dissociating from the nine identified binding sites. Related to Figure 3, Figure 4, SI Figure S6 and STAR Methods.

| Binding Sites | $k_{off}(\mu\text{s}^{-1})$       |                                   |                                   |
|---------------|-----------------------------------|-----------------------------------|-----------------------------------|
|               | Inactive                          | Active                            | Active + mini Gs                  |
| Nter/TM1/TM2  | 11 (CHOL)<br>4 (GM3)              | 9 (CHOL)<br>4 (GM3)               | 8 (CHOL)<br>3 (GM3)               |
| TM1/TM2/TM4   | 7 (CHOL)<br>7 (PIP <sub>2</sub> ) | 4 (CHOL)<br>6 (PIP <sub>2</sub> ) | 4 (CHOL)<br>3 (PIP <sub>2</sub> ) |
| TM2/ECL1/TM3  | 11 (CHOL)<br>2 (GM3)              | 9 (CHOL)<br>3 (GM3)               | 8 (CHOL)<br>5 (GM3)               |
| TM3/TM4/ECL2  | 8 (CHOL)<br>4 (GM3)               | 13 (CHOL)<br>4 (GM3)              | 10 (CHOL)<br>5 (GM3)              |
| TM3/ICL2/TM4  | 7 (CHOL)<br>6 (PIP <sub>2</sub> ) | 7 (CHOL)<br>4 (PIP <sub>2</sub> ) | 6 (CHOL)<br>3 (PIP <sub>2</sub> ) |
| TM3/TM5       | 5 (PIP <sub>2</sub> )             | 3 (PIP <sub>2</sub> )             | 5 (PIP <sub>2</sub> )             |
| TM4/ECL2/TM5  | 4 (GM3)                           | 4 (GM3)                           | 5 (GM3)                           |
| TM5/ECL3/TM6  | 8 (CHOL)<br>7 (GM3)               | 8 (CHOL)<br>5 (GM3)               | 7 (CHOL)<br>6 (GM3)               |
| TM6/TM7       | 9 (CHOL)<br>4 (PIP <sub>2</sub> ) | 7 (CHOL)<br>2 (PIP <sub>2</sub> ) | 7 (CHOL)<br>3 (PIP <sub>2</sub> ) |
